# Supplementary material for: Development of semi-continuous chemo-enzymatic terpene epoxidation: combination of anthraquinone autooxidation and the lipase-mediated epoxidation process
Source: Royal Society of Chemistry journal article supplement (doi:10.1039/c7re00112f), 2017-01-01

## SUPPLEMENTARY INFORMATION

### 1. GC-MS chromatogram for 3-carene and 3-carene oxide

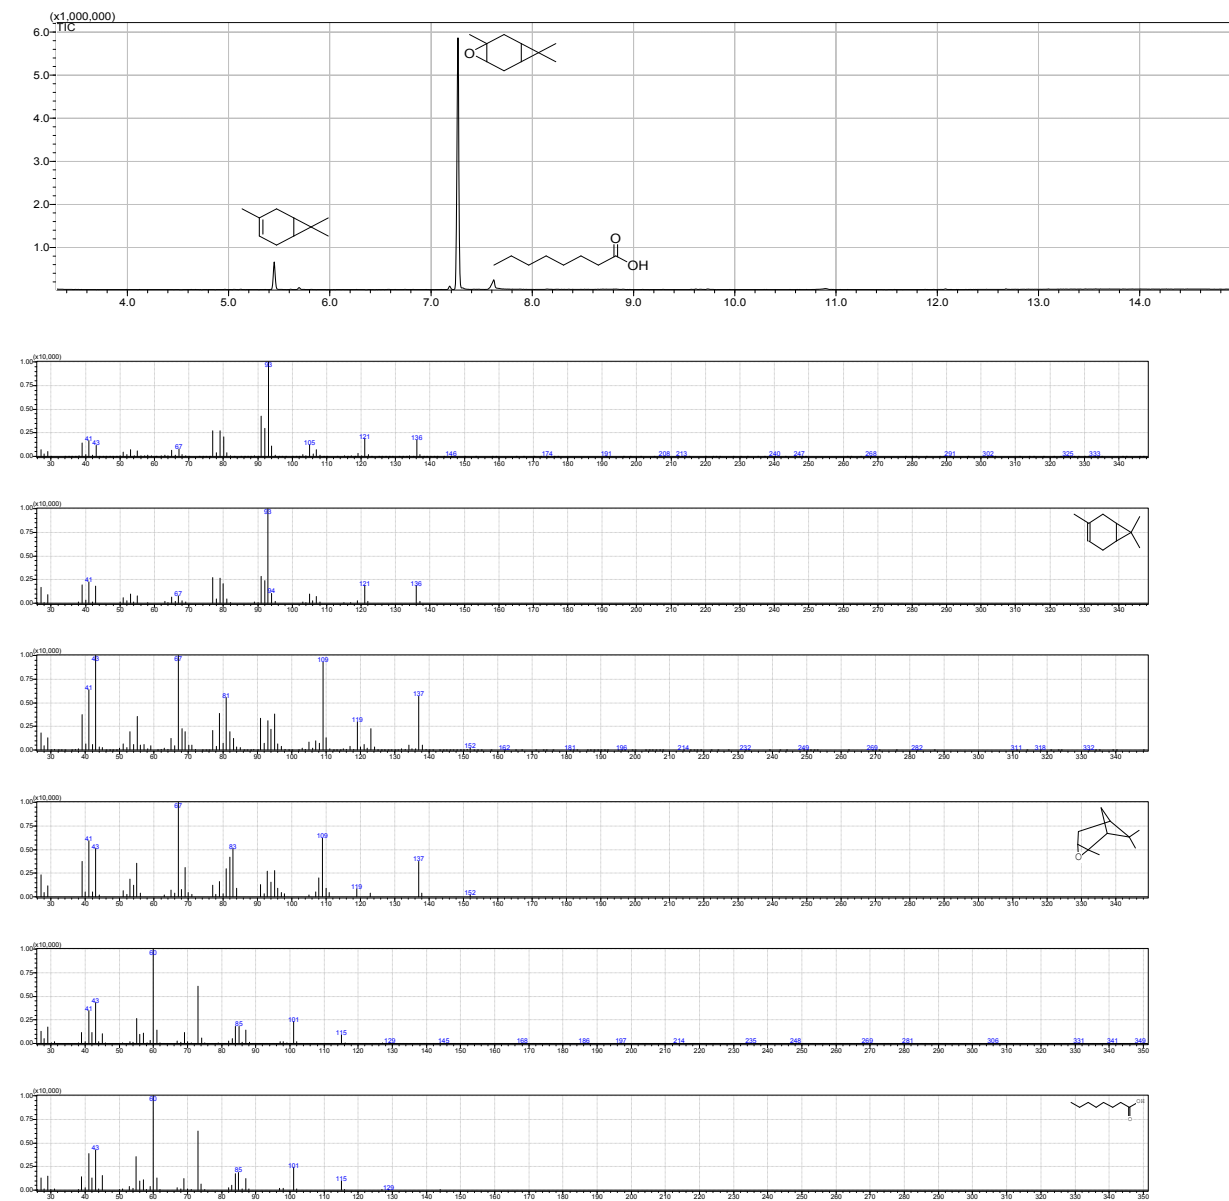

## 2. Limonene, limonene oxide and limonene dioxide

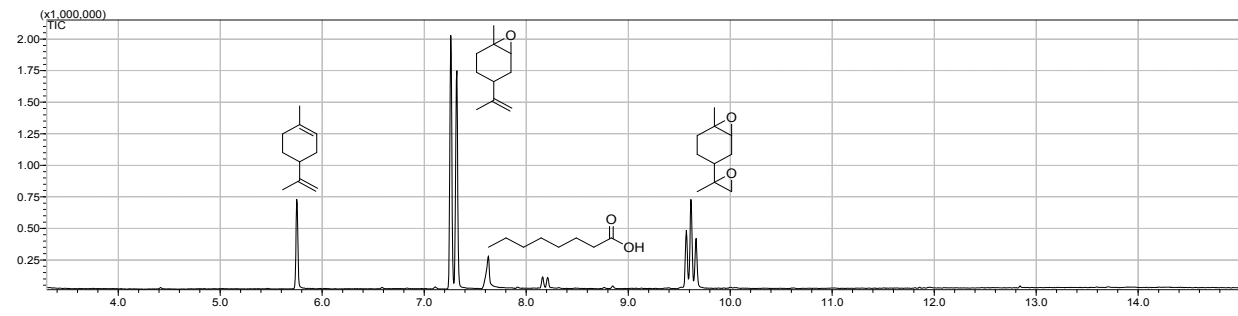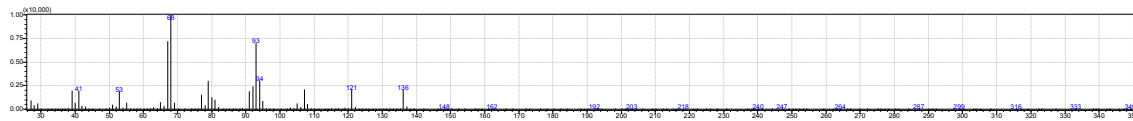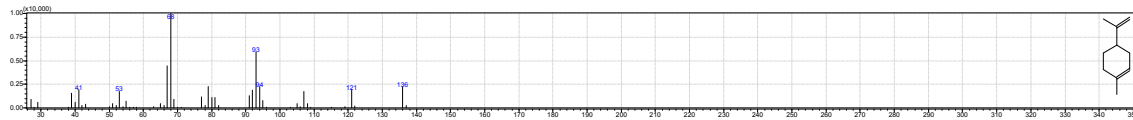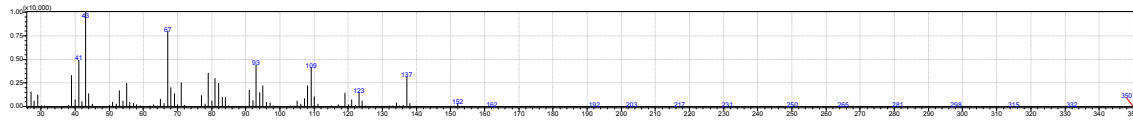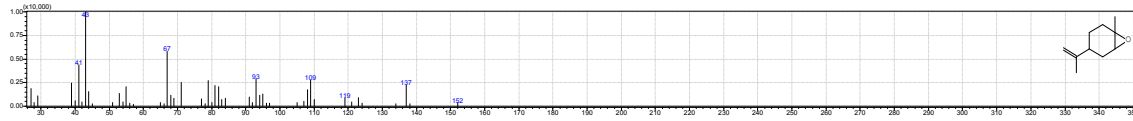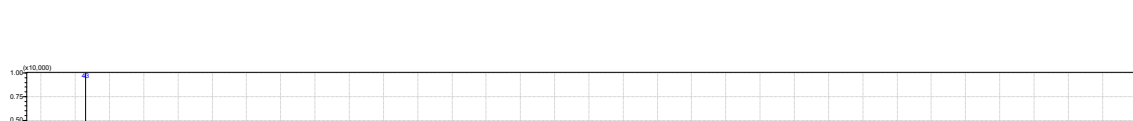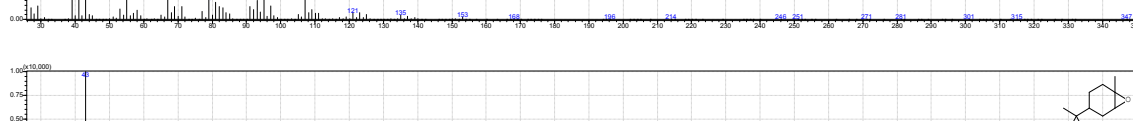

### 3. $\alpha$ -pinene and $\alpha$ -pinene oxide

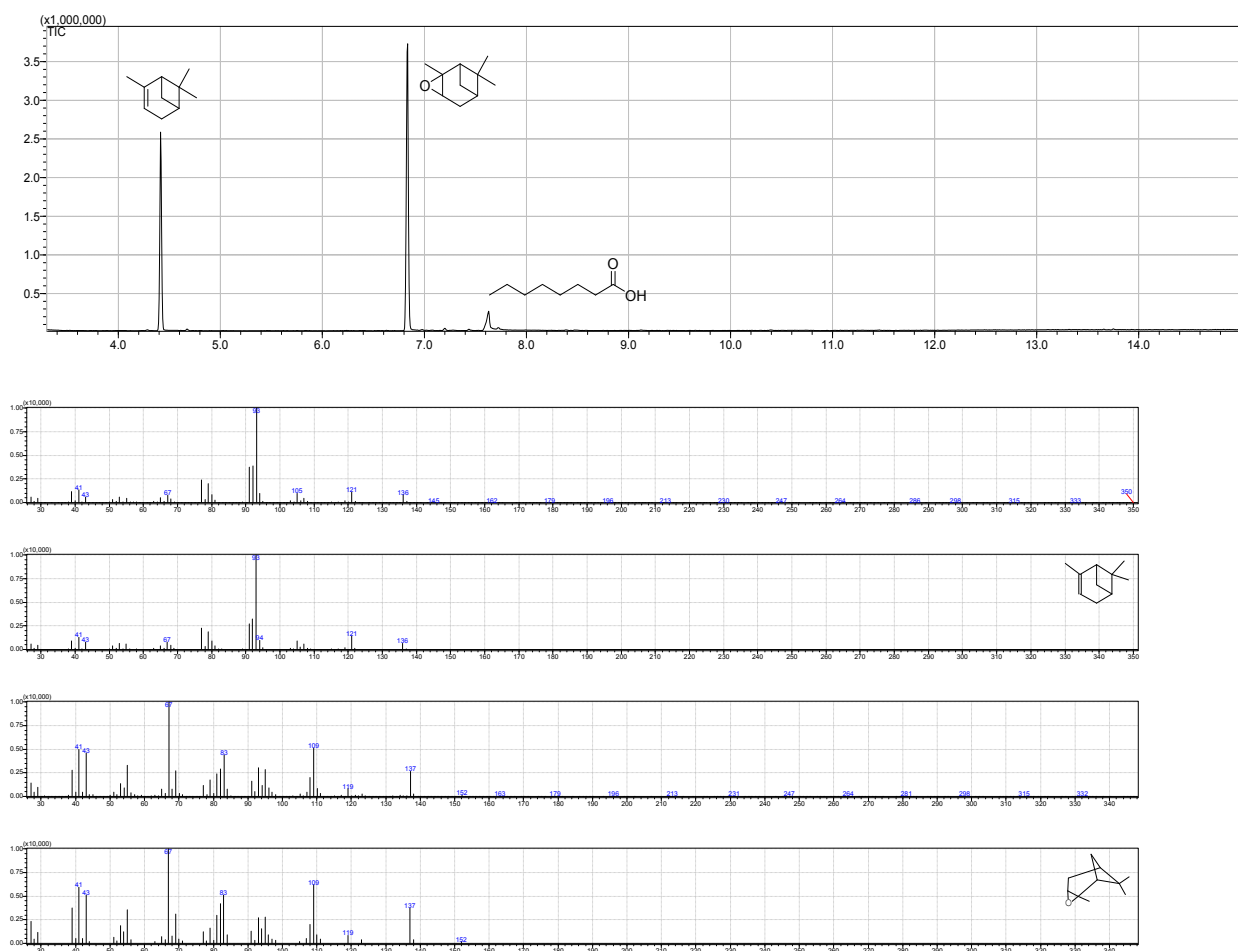

Supplement: c7re00112f1.pdf [file c7re00112f1.pdf]
